# Supplementary material for: Effect of 17β-Estradiol on Growth and Biosynthesis of Microalgae Scenedesmus quadricauda (CPCC-158) and Duckweed Lemna minor (CPCC-490) Grown in Three Different Media
Source: MDPI journal article supplement (doi:10.3390/plants11131669), 2022-06-24
Supplement: s1 [file s1]

## Supplementary Materials

**Table S1.** Macronutrients and buffering capacity of standard synthetic Bold's Basal Medium (BBM), 30% Hoagland's medium (30% HG), natural fishery wastewater (FWW), and reconstituted fishery wastewater (RFWW) used in the experiment, ppm.

|              | DOC  | TC   | TDS   | TN   | NO <sub>3</sub> | NO <sub>2</sub> | NH <sub>4</sub> -N | PO <sub>4</sub> -P | TDP | pH   | Alkalinity<br>(as<br>CaCO <sub>3</sub> ) | Conductivity<br>(mS/cm) |
|--------------|------|------|-------|------|-----------------|-----------------|--------------------|--------------------|-----|------|------------------------------------------|-------------------------|
| <b>BBM</b>   | <0.5 | <1   | 635   | 41   | 182             | 0               | 1.5                | 50                 | 50  | 6.8  | 354                                      | 720                     |
| <b>30%HG</b> | 70   | 60   | 25    | 74   | 0.25            | 1.5             | <0.005             | <0.005             | 0   | 0    | 0                                        | 0                       |
| <b>FWW</b>   | 19.4 | 60.4 | 585.5 | 20.5 | 175             | 0.2             | 0.7                | 0.9                | 30  | 7.75 | 363.7                                    | 555                     |
| <b>RFWW</b>  | <0.5 | 50   | 600   | 40   | 180             | 0               | 1                  | 50                 | 50  | 7    | 350                                      | 750                     |

DOC, Dissolve Organic Carbon; TC, Total Carbon (KHCO<sub>3</sub>; NaHCO<sub>3</sub>); TDS, Total Dissolved Solids; TN, Total Nitrogen; TDP, Total Dissolved Phosphorus.

**Table S2.** Micronutrients in standard synthetic Bold's Basal Medium (BBM), 30% Hoagland's medium (30% HG), natural fishery wastewater (FWW), and reconstituted fishery wastewater (RFWW) used in the experiment, ppm.

| Ions         | Ca   | Mg | K  | Na   | B    | Fe   | Cu     | Zn     | Al   | Ni | Pb    | Cd    |
|--------------|------|----|----|------|------|------|--------|--------|------|----|-------|-------|
| <b>BBM</b>   | 68   | 25 | 62 | 68   | 0.5  | 1.5  | 0.005  | 0.005  | 0    | 0  | 0     | 0     |
| <b>30%HG</b> | 70   | 60 | 25 | 74   | 0.25 | 1.5  | <0.005 | <0.005 | 0    | 0  | 0     | 0     |
| <b>FWW</b>   | 73.5 | 60 | 16 | 75.6 | 0.3  | 1.06 | 0.04*  | 0.007  | 0.04 | 0  | 0.001 | 0.005 |
| <b>RFWW</b>  | 70   | 40 | 52 | 68   | 0.5  | 1.5  | 0.005  | 0.005  | 0    | 0  | 0     | 0     |

\* - above LOEC (Lowest Observed Effect Concentration) for algae species [66, 67].

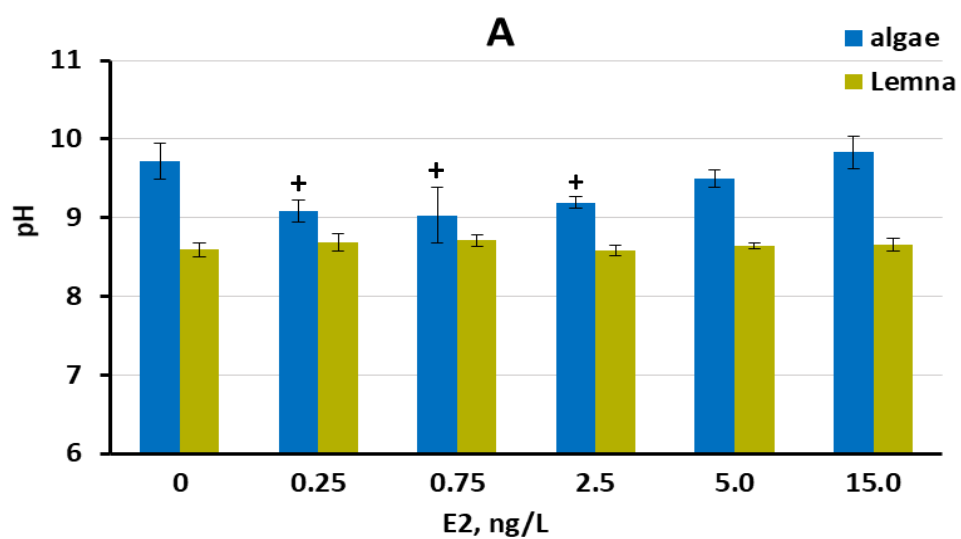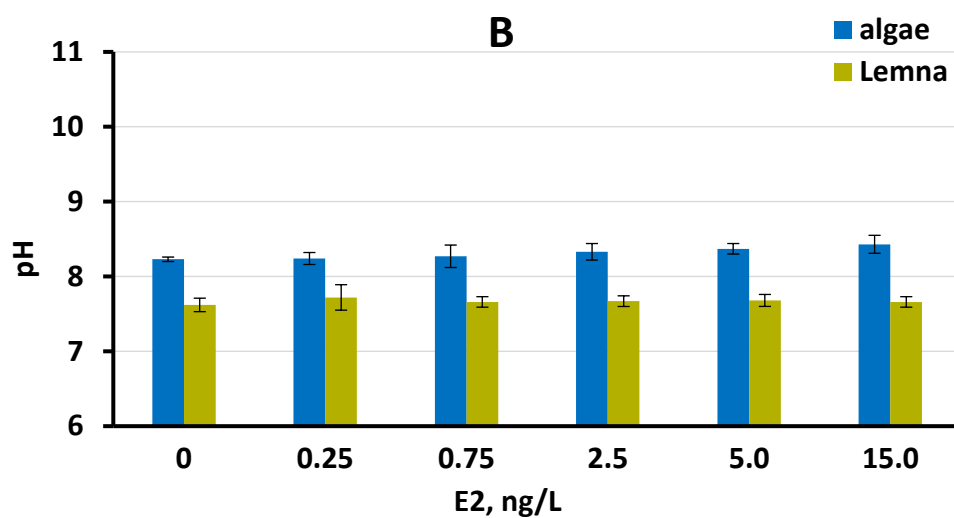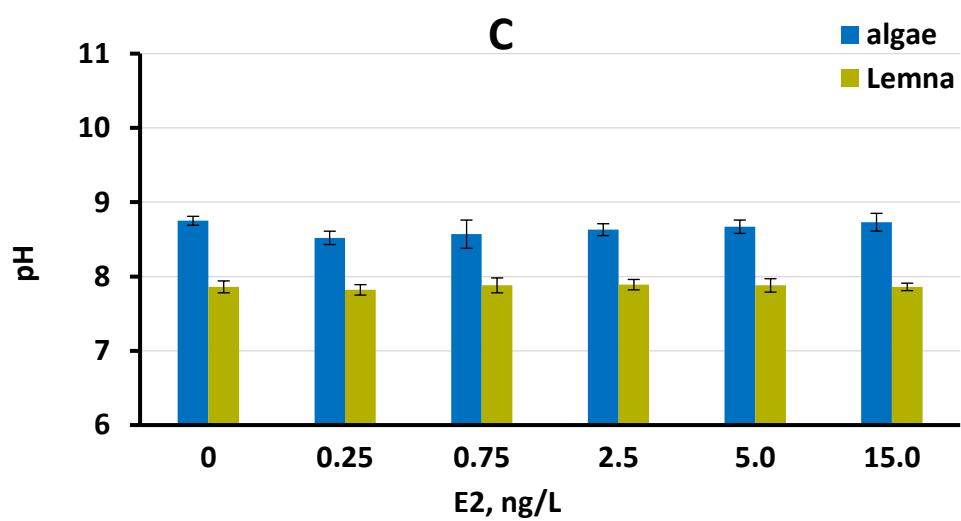

13 **Figure S1.** pH of three culture media on day 11 of the experiment: (A) FFW; (B) RFWW; (C) BBM.  
14 Statistically significant difference from the controls ( $p < 0.05$ ) are indicated, where \* - significantly greater  
15 than the control and + - significantly lower than the control. Data shown as the mean  $\pm$  SD, n = 4. Control  
16 cultures did not contain E2, indicated by “0”.  
17
